# Supplementary material for: A novel TRIM22 gene polymorphism promotes the response to PegIFNα therapy through cytokine-cytokine receptor interaction signaling pathway in chronic hepatitis B
Source: PubMed Central journal article supplement (PMC10715138; doi:10.1128/spectrum.02247-23), 2023-10-26
Supplement: reviewer-comments.pdf [file reviewer-comments.pdf]

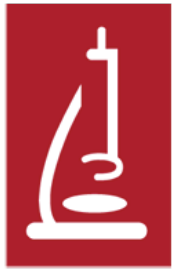

AMERICAN  
SOCIETY FOR  
MICROBIOLOGY

# Microbiology Spectrum

## A novel TRIM22 gene polymorphism promotes the response to PegIFN $\alpha$ therapy through cytokine-cytokine receptor interaction signaling pathway in chronic hepatitis B

Long Wang, Ni Lin, Yanfang Zhang, Shaoying Guo, Can Liu, Caorui Lin, Yong-bin Zeng, Wennan Wu, Jianhui Guo, Chenggong Zhu, Fuguo Zhan, Qishui Ou, and Zhen Xun

*Corresponding Author(s): Qishui Ou, Fujian Medical University*

---

### Review Timeline:

|                     |                   |
|---------------------|-------------------|
| Submission Date:    | May 29, 2023      |
| Editorial Decision: | July 7, 2023      |
| Revision Received:  | August 3, 2023    |
| Accepted:           | September 8, 2023 |

*Editor: Wei Liu*

*Reviewer(s): The reviewers have opted to remain anonymous.*

### Transaction Report:

(Note: With the exception of the correction of typographical or spelling errors that could be a source of ambiguity, letters and reports are not edited. The original formatting of letters and referee reports may not be reflected in this compilation.)

**DOI:** <https://doi.org/10.1128/spectrum.02247-23>

July 7, 2023

Mr. Qishui Ou  
Fujian Medical University  
Fuzhou  
China

Re: Spectrum02247-23 (A novel TRIM22 gene polymorphism promotes the response to PegIFN $\alpha$  therapy through cytokine-cytokine receptor interaction signaling pathway in chronic hepatitis B)

Dear Mr. Qishui Ou:

Thank you for submitting your manuscript to Microbiology Spectrum. When submitting the revised version of your paper, please provide (1) point-by-point responses to the issues raised by the reviewers as file type "Response to Reviewers," not in your cover letter, and (2) a PDF file that indicates the changes from the original submission (by highlighting or underlining the changes) as file type "Marked Up Manuscript - For Review Only". Please use this link to submit your revised manuscript - we strongly recommend that you submit your paper within the next 60 days or reach out to me. Detailed instructions on submitting your revised paper are below.

Link Not Available

Below you will find instructions from the Microbiology Spectrum editorial office and comments generated during the review.

ASM policy requires that data be available to the public upon online posting of the article, so please verify all links to sequence records, if present, and make sure that each number retrieves the full record of the data. If a new accession number is not linked or a link is broken, provide production staff with the correct URL for the record. If the accession numbers for new data are not publicly accessible before the expected online posting of the article, publication of your article may be delayed; please contact the ASM production staff immediately with the expected release date.

The ASM Journals program strives for constant improvement in our submission and publication process. Please tell us how we can improve your experience by taking this quick [Author Survey](#).

Sincerely,

Wei Liu

Editor, Microbiology Spectrum

Journals Department  
American Society for Microbiology  
1752 N St., NW  
Washington, DC 20036  
E-mail: [spectrum@asmusa.org](mailto:spectrum@asmusa.org)

Reviewer comments:

Reviewer #1 (Comments for the Author):

This research entitled "A novel TRIM22 gene polymorphism promotes the response to PegIFN $\alpha$  therapy through cytokine-cytokine receptor interaction signaling pathway in chronic hepatitis B" aimed to find and explain the potential marker for differential PegIFN $\alpha$  response. The study is generally well designed, and demonstrated that the rs10838543 CC genotype in TRIM22 increased secretion of the cytokines IFNL1, CCL3, and CCL5 from hepatocytes by regulating the cytokine-cytokine receptor interaction signaling pathway and was positively correlated with the PegIFN $\alpha$ -induced treatment response in patients with CHB. The study might be interesting for readers since it suggest that genotyping patients with CHB at rs10838543 polymorphism might be a potential biomarker helping physicians identify patients who are most likely to benefit from PegIFN $\alpha$  treatment. But there are still some concerns regarding this study:

1. In Figure 1C right half of the Western blot shows stronger background staining , the author should confirmed that the six lanes with our without PegIFN $\alpha$  treatment were conducted parallely without any manual modification.
2. The authors verify the transfection efficiency of their lentiviral transduction using flow cytometry (Supplemental) but provide no methods for these.
3. Part of the discussion is the repetition of the result. Please clearly pointed out the advantages and shortages of this study.
4. The English writing of the whole text needs to be polished.

Reviewer #2 (Comments for the Author):

Manuscript entitled: "A novel TRIM22 gene polymorphism promotes the response to PegIFN $\alpha$  therapy through cytokine-cytokine receptor interaction signaling pathway in chronic hepatitis B" is well supported and interesting, the authors had experimental evidences in patients and in cell lines, and proved that rs10838543 CC genotype in TRIM22 was found to be associated with positive response to PegIFN $\alpha$  treatment and more robustly inhibited HBV replication in cells compared to the TT genotype. However, there are several concerns that the authors should address in current manuscript.

1. Gene names should be written in italics (in lines 169 and 209, TRIM22 were formatted differently), uniform throughout, please check.
2. Materials and methods should be refined, such as flow cytometry.
3. As far as I know there are more than 80 members of the TRIM family, why these 14 TRIM genes were selected for the study?
4. In Figure 1C, TRIM22 upregulation in the presence of IFN $\alpha$  in HepAD38 cells were not very visible.
5. Although 107 patient samples were used for this study, the results in the tables and figures are not representative of all 107 patients. In the results the authors state (lines 236-239), for example, that 100 people were used. The explanation needs to be given of the particular sampling done for certain analyses.
6. For the RNA fold analysis, the authors showed that a nucleotide change could induce changes in the secondary structure. But the time interval of the actinomycin D test is so long that it basically reaches the plateau after 2 hours, and it is recommended to shorten the time interval.

Staff Comments:

### Preparing Revision Guidelines

To submit your modified manuscript, log onto the eJP submission site at <https://spectrum.msubmit.net/cgi-bin/main.plex>. Go to Author Tasks and click the appropriate manuscript title to begin the revision process. The information that you entered when you first submitted the paper will be displayed. Please update the information as necessary. Here are a few examples of required updates that authors must address:

- Point-by-point responses to the issues raised by the reviewers in a file named "Response to Reviewers," NOT IN YOUR COVER LETTER.
- Upload a compare copy of the manuscript (without figures) as a "Marked-Up Manuscript" file.
- Each figure must be uploaded as a separate file, and any multipanel figures must be assembled into one file.
- Manuscript: A .DOC version of the revised manuscript
- Figures: Editable, high-resolution, individual figure files are required at revision, TIFF or EPS files are preferred

For complete guidelines on revision requirements, please see the journal Submission and Review Process requirements at <https://journals.asm.org/journal/Spectrum/submission-review-process>. **Submissions of a paper that does not conform to Microbiology Spectrum guidelines will delay acceptance of your manuscript. "**

Please return the manuscript within 60 days; if you cannot complete the modification within this time period, please contact me. If you do not wish to modify the manuscript and prefer to submit it to another journal, please notify me of your decision immediately so that the manuscript may be formally withdrawn from consideration by Microbiology Spectrum.

If your manuscript is accepted for publication, you will be contacted separately about payment when the proofs are issued; please follow the instructions in that e-mail. Arrangements for payment must be made before your article is published. For a complete list of **Publication Fees**, including supplemental material costs, please visit our [website](#).

Corresponding authors may [join or renew ASM membership](#) to obtain discounts on publication fees. Need to upgrade your membership level? Please contact Customer Service at [Service@asmusa.org](mailto:Service@asmusa.org).

Thank you for submitting your paper to Microbiology Spectrum.

This research entitled “A novel TRIM22 gene polymorphism promotes the response to PegIFN $\alpha$  therapy through cytokine-cytokine receptor interaction signaling pathway in chronic hepatitis B” aimed to find and explain the potential marker for differential PegIFN $\alpha$  response. The study is generally well designed, and demonstrated that the rs10838543 CC genotype in TRIM22 increased secretion of the cytokines IFNL1, CCL3, and CCL5 from hepatocytes by regulating the cytokine-cytokine receptor interaction signaling pathway and was positively correlated with the PegIFN $\alpha$ -induced treatment response in patients with CHB. The study might be interesting for readers since it suggest that genotyping patients with CHB at rs10838543 polymorphism might be a potential biomarker helping physicians identify patients who are most likely to benefit from PegIFN $\alpha$  treatment. But there are still some concerns regarding this study:

1. In Figure 1C right half of the Western blot shows stronger background staining , the author should confirmed that the six lanes with our without PegIFN $\alpha$  treatment were conducted parallely without any manual modification.
2. The authors verify the transfection efficiency of their lentiviral transduction using flow cytometry (Supplemental) but provide no methods for these.
3. Part of the discussion is the repetition of the result. Please clearly pointed out the advantages and shortages of this study.
4. The English writing of the whole text needs to be polished.

Manuscript entitled: “A novel TRIM22 gene polymorphism promotes the response to PegIFN $\alpha$  therapy through cytokine-cytokine receptor interaction signaling pathway in chronic hepatitis B” is well supported and interesting, the authors had experimental evidences in patients and in cell lines, and proved that rs10838543 CC genotype in TRIM22 was found to be associated with positive response to PegIFN $\alpha$  treatment and more robustly inhibited HBV replication in cells compared to the TT genotype.

However, there are several concerns that the authors should address in current manuscript.

1. Gene names should be written in italics (in lines 169 and 209, TRIM22 were formatted differently), uniform throughout, please check.

2. Materials and methods should be refined, such as flow cytometry.

3. As far as I know there are more than 80 members of the TRIM family, why these 14 TRIM genes were selected for the study?

4. In Figure 1C, TRIM22 upregulation in the presence of IFN $\alpha$  in HepAD38 cells were not very visible.

5. Although 107 patient samples were used for this study, the results in the tables and figures are not representative of all 107 patients. In the results the authors state (lines 236-239), for example, that 100 people were used. The explanation needs to be given of the particular sampling done for certain analyses.

6. For the RNA fold analysis, the authors showed that a nucleotide change could induce changes in the secondary structure. But the time interval of the actinomycin D test is so long that it basically reaches the plateau after 2 hours, and it is recommended to shorten the time interval.

Point-by-point Responses to the Editor and Reviewers' Comments (the Editor and Reviewers' comments are in **bold**):

Major changes to the text in the revised manuscript have been highlighted in yellow.

**Reviewer #1: This research entitled "A novel TRIM22 gene polymorphism promotes the response to PegIFN $\alpha$  therapy through cytokine-cytokine receptor interaction signaling pathway in chronic hepatitis B" aimed to find and explain the potential marker for differential PegIFN $\alpha$  response. The study is generally well designed, and demonstrated that the rs10838543 CC genotype in TRIM22 increased secretion of the cytokines IFNL1, CCL3, and CCL5 from hepatocytes by regulating the cytokine-cytokine receptor interaction signaling pathway and was positively correlated with the PegIFN $\alpha$ -induced treatment response in patients with CHB. The study might be interesting for readers since it suggest that genotyping patients with CHB at rs10838543 polymorphism might be a potential biomarker helping physicians identify patients who are most likely to benefit from PegIFN $\alpha$  treatment. But there are still some concerns regarding this study:**

**1. In Figure 1C right half of the Western blot shows stronger background staining, the author should confirmed that the six lanes with our without PegIFN $\alpha$  treatment were conducted parallely without any manual modification.**

**Response:** We apologize for the confusion. In the revised manuscript, we have reextracted new proteins and performed Western blot to detect the expression level of TRIM22 with or without PegIFN $\alpha$  treatment. The results showed that PegIFN $\alpha$  significantly promoted the expression of TRIM22 protein in HepAD38 cells (**Fig. 1C, as shown below**)

C

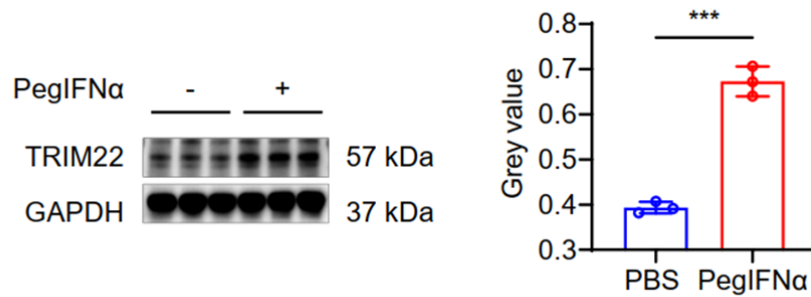

**Fig. 1. PegIFN $\alpha$  treatment upregulates TRIM22 expression**

**2. The authors verify the transfection efficiency of their lentiviral transduction using flow cytometry (Supplemental) but provide no methods for these.**

**Response:** Thank you for your comment. In the revised manuscript, we have provided the methods in the supplemental material as follow:

#### **Transfection efficiency of the lentiviral transduction**

Evaluation of transduction efficiency was conducted using green fluorescent protein (GFP) expressed in all lentiviruses. Cells were washed three times with PBS, and then dissociated with trypsin. After cell suspensions by DMEM, cells were transferred to suitable FACS tubes. A negative control was performed using untransfected HepAD38 cells. FITC fluorescence was analyzed by flow cytometry and expressed as a percentage. (Supplemental Material, methods, page 3, lines 45-50)

**3. Part of the discussion is the repetition of the result. Please clearly pointed out the advantages and shortages of this study.**

**Response:** Thank you for your constructive suggestion. In the revised manuscript, we have added the following text to discuss the advantages and shortages of this study:

In this study, we demonstrated that a novel *TRIM22* gene polymorphism, SNP rs10838543 in *TRIM22*, promotes the response to PegIFN $\alpha$  therapy by elevating levels of IFNL1, CCL3, and CCL5 through cytokine-cytokine receptor interaction signaling pathway in CHB patients. Genotyping patients with CHB for the SNP



rs10838543 in *TRIM22* may be a useful biomarker to help physicians identify patients who are more likely to respond to PegIFN $\alpha$  therapy. (Discussion, pages 15, lines 312-317)

There are still some limitations to our current study that will be addressed in further research. First, *TRIM22* is expressed only in human and nonhuman primates, and, owing to a lack of a license for breeding tree shrews, we were unable to validate our findings *in vivo*. Future studies should prioritize controlled *in vivo* studies to confirm the relevance of the SNP rs10838543 genotypes in *TRIM22* for PegIFN $\alpha$  therapy. Second, further delineation of the molecular mechanism that results in differential IFNL expression in the context of different SNP rs10838543 genotypes in *TRIM22*, and whether this might occur due to inhibition of *suppressors of cytokine signaling* (*SOCS*) 1, *SOCS2*, or *SOCS3*, is warranted. (Discussion, page 18, lines 377-378, line 382)

#### 4. The English writing of the whole text needs to be polished.

**Response:** We apologize for the language problems in the original manuscript. In the revised manuscript, we have improved the language presentation with the assistance from a native English speaker with appropriate research background.

**Reviewer #2: Manuscript entitled: "A novel TRIM22 gene polymorphism promotes the response to PegIFN $\alpha$  therapy through cytokine-cytokine receptor interaction signaling pathway in chronic hepatitis B" is well supported and interesting, the authors had experimental evidences in patients and in cell lines, and proved that rs10838543 CC genotype in TRIM22 was found to be associated with positive response to PegIFN $\alpha$  treatment and more robustly inhibited HBV replication in cells compared to the TT genotype.**

**However, there are several concerns that the authors should address in current manuscript.**

**1. Gene names should be written in italics (in lines 169 and 209, TRIM22 were formatted differently), uniform throughout, please check.**

**Response:** Thank you for your suggestion. In the revised manuscript, we have scrutinized the full text and made the appropriate formatting changes. **(Line 3, line 7, line 47, line 118, line 132, line 178, line 189, line 226, lines 261-262, line 284, lines 287-288, line 292, lines 296-297, line 326, line 360, line 362, and line 539)**

**2. Materials and methods should be refined, such as flow cytometry.**

**Response:** Thank you for your important comment. In the revised manuscript, we have supplemented the methods for flow cytometry in the Supplemental material as follow:

#### **Transfection efficiency of the lentiviral transduction**

**Evaluation of transduction efficiency was conducted using green fluorescent protein (GFP) expressed in all lentiviruses. Cells were washed three times with PBS, and then dissociated with trypsin. After cell suspensions by DMEM, cells were transferred to suitable FACS tubes. A negative control was performed using untransfected HepAD38 cells. FITC fluorescence was analyzed by flow cytometry and expressed as a percentage. **(Supplemental Material, methods, page 3, lines 45-50)****

**3. As far as I know there are more than 80 members of the TRIM family, why these 14 TRIM genes were selected for the study?**

**Response:** This is an important question. There were indeed more than 80 members of the TRIM families (DOI: 10.1016/j.tibs.2017.01.002). However, the aim of this study was to find genes and their polymorphisms associated with PegIFN $\alpha$  efficacy. In our previous work, we screened only 14 TRIM genes with differences between the CR and SR groups by ASA microarray. Therefore, we selected these 14 TRIM genes for the study.

**4. In Figure 1C, TRIM22 upregulation in the presence of IFN $\alpha$  in HepAD38 cells were not very visible.**

**Response:** Thank you for your important comments. In the revised manuscript, we have repeated this experiment and the results showed that PegIFN $\alpha$  indeed promoted the expression of TRIM22 protein in Hep AD38 cells. (Fig. 1C, as shown below)

**C**

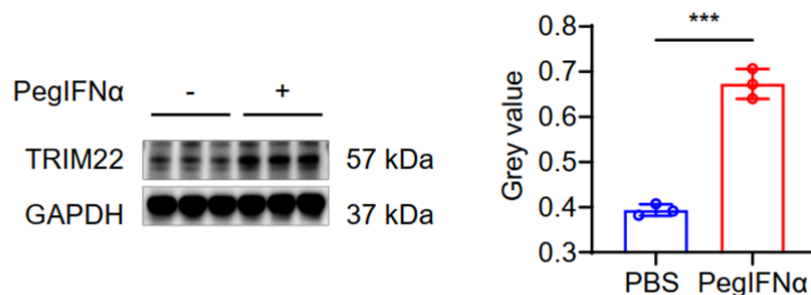

**Fig. 1. PegIFN $\alpha$  treatment upregulates TRIM22 expression**

**5. Although 107 patient samples were used for this study, the results in the tables and figures are not representative of all 107 patients. In the results the authors state (lines 236-239), for example, that 100 people were used. The explanation needs to be given of the particular sampling done for certain analyses.**

**Response:** We apologize for the confusion. Due to the limitations of ethics and

sample size, each specimen was unable to be tested simultaneously for both Asian Screening Array (ASA) gene chips and validation of various candidate gene biomarkers. In this study, we performed peripheral blood samples using ASA gene chips. Then, we verified the levels of these differentially expressed genes by qRT-PCR. Our study was limited by the variable volumes of patient sample available, and with each additional test and validation performed, remaining sample volume further decreased past usable levels, preventing us from uniformly assaying all patient samples.

**6. For the RNA fold analysis, the authors showed that a nucleotide change could induce changes in the secondary structure. But the time interval of the actinomycin D test is so long that it basically reaches the plateau after 2 hours, and it is recommended to shorten the time interval.**

**Response:** Thanks for your very thoughtful suggestion. In the revised manuscript, according to the reviewer's comment, cells were seeded in 6-well plates at a density of  $2 \times 10^5$  cells per well for 24 hours, then cells were collected at 0 h, 0.5 h, 1 h, 1.5 h, 2 h and 3 h after actinomycin D treatment. The mRNA level of *TRIM22* was detected by qRT-PCR. We found that the half-life of mRNA of SNP rs10838543 CC genotype in *TRIM22* ( $t_{1/2}=1.50$  h) was still significantly longer than TT genotype ( $t_{1/2}=0.57$  h) (Fig. 2F, as shown below, lines 261-262)

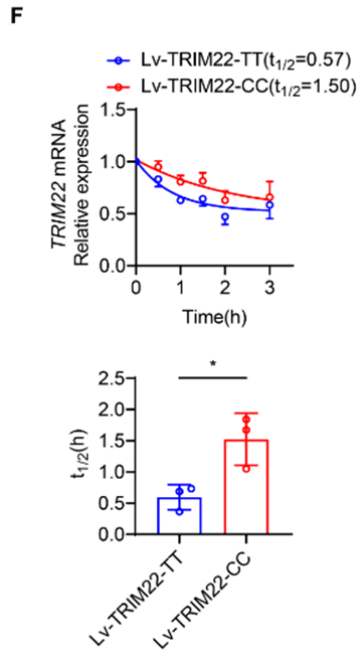

**Fig. 2.** The SNP rs10838543 CC genotype in **TRIM22** has higher *TRIM22* mRNA level and more stable than TT genotype

September 8, 2023

Mr. Qishui Ou  
Fujian Medical University  
Fuzhou  
China

Re: Spectrum02247-23R1 (A novel TRIM22 gene polymorphism promotes the response to PegIFN $\alpha$  therapy through cytokine-cytokine receptor interaction signaling pathway in chronic hepatitis B)

Dear Mr. Qishui Ou:

Your manuscript has been accepted, and I am forwarding it to the ASM Journals Department for publication. You will be notified when your proofs are ready to be viewed.

The ASM Journals program strives for constant improvement in our submission and publication process. Please tell us how we can improve your experience by taking this quick [Author Survey](#).

**Publication Fees:** We have partnered with Copyright Clearance Center to collect author charges. You will soon receive a message from no-reply@copyright.com with further instructions. For questions related to paying charges through RightsLink, please contact Copyright Clearance Center by email at ASM\_Support@copyright.com or toll free at +1.877.622.5543. Hours of operation: 24 hours per day, 7 days per week. Copyright Clearance Center makes every attempt to respond to all emails within 24 hours. For a complete list of **Publication Fees**, including supplemental material costs, please visit our [website](#).

ASM policy requires that data be available to the public upon online posting of the article, so please verify all links to sequence records, if present, and make sure that each number retrieves the full record of the data. If a new accession number is not linked or a link is broken, provide production staff with the correct URL for the record. If the accession numbers for new data are not publicly accessible before the expected online posting of the article, publication of your article may be delayed; please contact the ASM production staff immediately with the expected release date.

Corresponding authors may [join or renew ASM membership](#) to obtain discounts on publication fees. Need to upgrade your membership level? Please contact Customer Service at Service@asmusa.org.

Thank you for submitting your paper to Spectrum.

Sincerely,

Wei Liu  
Editor, Microbiology Spectrum

Journals Department  
American Society for Microbiology  
1752 N St., NW  
Washington, DC 20036  
E-mail: spectrum@asmusa.org
